# Supplementary material for: Phylogenetic Comparison and Splicing Analysis of U1 snRNP-specific Protein U1C in Eukaryotes
Source: Research Square preprint supplement (doi:10.21203/rs.3.rs-142800/v1), 2021-01-11
Supplement: Supplementary file 1 [file 756a26ad1693d44ef99e64f7.xlsx]

## Sheet: Sheet1
Table S3 Detailed information of predicted functional partners of human, mouse and yeast U1Cs.
Homo sapiens
Predicted Functional Partners:
No.	gene ID	protein ID	annotation		score
1	ENSP00000412566	SNRPB	Small nuclear ribonucleoprotein-associated proteins B and B; Core component of the spliceosomal U1, U2, U4 and U5 small nuclear ribonucleoproteins (snRNPs), the building blocks of the spliceosome. Thereby, plays an important role in the splicing of cellular pre-mRNAs. Most spliceosomal snRNPs contain a common set of Sm proteins SNRPB, SNRPD1, SNRPD2, SNRPD3, SNRPE, SNRPF and SNRPG that assemble i…		0.999
2	ENSP00000400591	SNRPE	Small nuclear ribonucleoprotein E; Core component of the spliceosomal U1, U2, U4 and U5 small nuclear ribonucleoproteins (snRNPs), the building blocks of the spliceosome. Thereby, plays an important role in the splicing of cellular pre-mRNAs. Most spliceosomal snRNPs contain a common set of Sm proteins SNRPB, SNRPD1, SNRPD2, SNRPD3, SNRPE, SNRPF and SNRPG that assemble in a heptameric protein rin…		0.998
3	ENSP00000472998	SNRNP70	U1 small nuclear ribonucleoprotein 70 kDa; Component of the spliceosomal U1 snRNP, which is essential for recognition of the pre-mRNA 5’ splice-site and the subsequent assembly of the spliceosome. SNRNP70 binds to the loop I region of U1-snRNA. The truncated isoforms cannot bind U1-snRNA; RNA binding motif containing (437 aa)		0.998
4	ENSP00000266735	SNRPF	Small nuclear ribonucleoprotein F; Core component of the spliceosomal U1, U2, U4 and U5 small nuclear ribonucleoproteins (snRNPs), the building blocks of the spliceosome. Thereby, plays an important role in the splicing of cellular pre-mRNAs. Most spliceosomal snRNPs contain a common set of Sm proteins SNRPB, SNRPD1, SNRPD2, SNRPD3, SNRPE, SNRPF and SNRPG that assemble in a heptameric protein rin…		0.998
5	ENSP00000272348	SNRPG	Small nuclear ribonucleoprotein G; Core component of the spliceosomal U1, U2, U4 and U5 small nuclear ribonucleoproteins (snRNPs), the building blocks of the spliceosome. Thereby, plays an important role in the splicing of cellular pre-mRNAs. Most spliceosomal snRNPs contain a common set of Sm proteins SNRPB, SNRPD1, SNRPD2, SNRPD3, SNRPE, SNRPF and SNRPG that assemble in a heptameric protein rin…		0.998
6	ENSP00000342374	SNRPD2	Small nuclear ribonucleoprotein Sm D2; Core component of the spliceosomal U1, U2, U4 and U5 small nuclear ribonucleoproteins (snRNPs), the building blocks of the spliceosome. Thereby, plays an important role in the splicing of cellular pre-mRNAs. Most spliceosomal snRNPs contain a common set of Sm proteins SNRPB, SNRPD1, SNRPD2, SNRPD3, SNRPE, SNRPF and SNRPG that assemble in a heptameric protein…		0.995
7	ENSP00000215829	SNRPD3	Small nuclear ribonucleoprotein Sm D3; Core component of the spliceosomal U1, U2, U4 and U5 small nuclear ribonucleoproteins (snRNPs), the building blocks of the spliceosome. Thereby, plays an important role in the splicing of cellular pre-mRNAs. Most spliceosomal snRNPs contain a common set of Sm proteins SNRPB, SNRPD1, SNRPD2, SNRPD3, SNRPE, SNRPF and SNRPG that assemble in a heptameric protein…		0.995
8	ENSP00000382972	SNRPN	Small nuclear ribonucleoprotein-associated protein N; May be involved in tissue-specific alternative RNA processing events; Sm spliceosomal proteins (240 aa)		0.991
9	ENSP00000362110	SF3A3	Splicing factor 3A subunit 3; Subunit of the splicing factor SF3A required for ’A’ complex assembly formed by the stable binding of U2 snRNP to the branchpoint sequence (BPS) in pre-mRNA. Sequence independent binding of SF3A/SF3B complex upstream of the branch site is essential, it may anchor U2 snRNP to the pre-mRNA. May also be involved in the assembly of the ’E’ complex; U2 small nucleolar rib…		0.98
10	ENSP00000300413	SNRPD1	Small nuclear ribonucleoprotein Sm D1; Core component of the spliceosomal U1, U2, U4 and U5 small nuclear ribonucleoproteins (snRNPs), the building blocks of the spliceosome. Thereby, plays an important role in the splicing of cellular pre-mRNAs. Most spliceosomal snRNPs contain a common set of Sm proteins SNRPB, SNRPD1, SNRPD2, SNRPD3, SNRPE, SNRPF and SNRPG that assemble in a heptameric protein…		0.975
Mus musculus
Predicted Functional Partners:
No.	gene ID	protein ID	annotation		score
1	ENSMUSP00000074160	Snrnp70	U1 small nuclear ribonucleoprotein 70 kDa; Component of the spliceosomal U1 snRNP, which is essential for recognition of the pre-mRNA 5’ splice-site and the subsequent assembly of the spliceosome. SNRNP70 binds to the loop I region of U1-snRNA. The truncated isoforms cannot bind U1-snRNA (By similarity) (448 aa)		0.997
2	ENSMUSP00000020397	Snrpd3	Small nuclear ribonucleoprotein Sm D3; Core component of the spliceosomal U1, U2, U4 and U5 small nuclear ribonucleoproteins (snRNPs), the building blocks of the spliceosome. Thereby, plays an important role in the splicing of cellular pre-mRNAs. Most spliceosomal snRNPs contain a common set of Sm proteins SNRPB, SNRPD1, SNRPD2, SNRPD3, SNRPE, SNRPF and SNRPG that assemble in a heptameric protein…		0.997
3	ENSMUSP00000099488	Snrpb	Small nuclear ribonucleoprotein-associated protein B; Core component of the spliceosomal U1, U2, U4 and U5 small nuclear ribonucleoproteins (snRNPs), the building blocks of the spliceosome. Thereby, plays an important role in the splicing of cellular pre-mRNAs. Most spliceosomal snRNPs contain a common set of Sm proteins SNRPB, SNRPD1, SNRPD2, SNRPD3, SNRPE, SNRPF and SNRPG that assemble in a hep…		0.996
4	ENSMUSP00000020203	Snrpf	Small nuclear ribonucleoprotein F; Core component of the spliceosomal U1, U2, U4 and U5 small nuclear ribonucleoproteins (snRNPs), the building blocks of the spliceosome. Thereby, plays an important role in the splicing of cellular pre-mRNAs. Most spliceosomal snRNPs contain a common set of Sm proteins SNRPB, SNRPD1, SNRPD2, SNRPD3, SNRPE, SNRPF and SNRPG that assemble in a heptameric protein rin…		0.996
5	ENSMUSP00000037597	Snrpd2	Small nuclear ribonucleoprotein Sm D2; Core component of the spliceosomal U1, U2, U4 and U5 small nuclear ribonucleoproteins (snRNPs), the building blocks of the spliceosome. Thereby, plays an important role in the splicing of cellular pre-mRNAs. Most spliceosomal snRNPs contain a common set of Sm proteins SNRPB, SNRPD1, SNRPD2, SNRPD3, SNRPE, SNRPF and SNRPG that assemble in a heptameric protein…		0.995
6	ENSMUSP00000128400	Snrpe	Small nuclear ribonucleoprotein E; Core component of the spliceosomal U1, U2, U4 and U5 small nuclear ribonucleoproteins (snRNPs), the building blocks of the spliceosome. Thereby, plays an important role in the splicing of cellular pre-mRNAs. Most spliceosomal snRNPs contain a common set of Sm proteins SNRPB, SNRPD1, SNRPD2, SNRPD3, SNRPE, SNRPF and SNRPG that assemble in a heptameric protein rin…		0.991
7	ENSMUSP00000137416	Gm8186	Small nuclear ribonucleoprotein G; Core component of the spliceosomal U1, U2, U4 and U5 small nuclear ribonucleoproteins (snRNPs), the building blocks of the spliceosome. Thereby, plays an important role in the splicing of cellular pre-mRNAs. Most spliceosomal snRNPs contain a common set of Sm proteins SNRPB, SNRPD1, SNRPD2, SNRPD3, SNRPE, SNRPF and SNRPG that assemble in a heptameric protein rin…		0.987
8	ENSMUSP00000096003	Snrpn	Small nuclear ribonucleoprotein-associated protein N; May be involved in tissue-specific alternative RNA processing events (240 aa)		0.978
9	ENSMUSP00000002551	Snrpd1	Small nuclear ribonucleoprotein Sm D1; Core component of the spliceosomal U1, U2, U4 and U5 small nuclear ribonucleoproteins (snRNPs), the building blocks of the spliceosome. Thereby, plays an important role in the splicing of cellular pre-mRNAs. Most spliceosomal snRNPs contain a common set of Sm proteins SNRPB, SNRPD1, SNRPD2, SNRPD3, SNRPE, SNRPF and SNRPG that assemble in a heptameric protein…		0.973
10	ENSMUSP00000030734	Sf3a3	Splicing factor 3A subunit 3; Subunit of the splicing factor SF3A required for ’A’ complex assembly formed by the stable binding of U2 snRNP to the branchpoint sequence (BPS) in pre-mRNA. Sequence independent binding of SF3A/SF3B complex upstream of the branch site is essential, it may anchor U2 snRNP to the pre-mRNA. May also be involved in the assembly of the ’E’ complex (By similarity) (501 aa)		0.967
Saccharomyces cerevisiae
Predicted Functional Partners:
No.	gene ID	protein ID	annotation		score
1	YFL017W-A	SMX2	Small nuclear ribonucleoprotein G; Core Sm protein Sm G; part of heteroheptameric complex (with Smb1p, Smd1p, Smd2p, Smd3p, Sme1p, and Smx3p) that is part of the spliceosomal U1, U2, U4, and U5 snRNPs; homolog of human Sm G (77 aa)		0.999
2	YIL061C	SNP1	U1 small nuclear ribonucleoprotein 70 kDa homolog; Component of U1 snRNP required for mRNA splicing via spliceosome; substrate of the arginine methyltransferase Hmt1p; may interact with poly(A) polymerase to regulate polyadenylation; homolog of human U1 70K protein; protein abundance increases in response to DNA replication stress (300 aa)		0.999
3	YER029C	SMB1	Small nuclear ribonucleoprotein-associated protein B; Core Sm protein Sm B; part of heteroheptameric complex (with Smd1p, Smd2p, Smd3p, Sme1p, Smx3p, and Smx2p) that is part of the spliceosomal U1, U2, U4, and U5 snRNPs; homolog of human Sm B and Sm B’; Belongs to the snRNP SmB/SmN family (196 aa)		0.999
4	YLR275W	SMD2	Small nuclear ribonucleoprotein Sm D2; Core Sm protein Sm D2; part of heteroheptameric complex (with Smb1p, Smd1p, Smd3p, Sme1p, Smx3p, and Smx2p) that is part of the spliceosomal U1, U2, U4, and U5 snRNPs; homolog of human Sm D2 (110 aa)		0.999
5	YLR147C	SMD3	Small nuclear ribonucleoprotein Sm D3; Core Sm protein Sm D3; part of heteroheptameric complex (with Smb1p, Smd1p, Smd2p, Sme1p, Smx3p, and Smx2p) that is part of the spliceosomal U1, U2, U4, and U5 snRNPs; homolog of human Sm D3 (101 aa)		0.999
6	YOR159C	SME1	Small nuclear ribonucleoprotein E; Core Sm protein Sm E; part of heteroheptameric complex (with Smb1p, Smd1p, Smd2p, Smd3p, Smx3p, and Smx2p) that is part of the spliceosomal U1, U2, U4, and U5 snRNPs; homolog of human Sm E (94 aa)		0.999
7	YPR182W	SMX3	Small nuclear ribonucleoprotein F; Core Sm protein Sm F; part of heteroheptameric complex (with Smb1p, Smd1p, Smd2p, Smd3p, Sme1p, and Smx2p) that is part of the spliceosomal U1, U2, U4, and U5 snRNPs; homolog of human Sm F (86 aa)		0.999
8	YHR086W	NAM8	RNA binding protein, component of the U1 snRNP protein; mutants are defective in meiotic recombination and in formation of viable spores, involved in the formation of DSBs through meiosis-specific splicing of REC107 pre-mRNA; Nam8p regulon embraces the meiotic pre-mRNAs of REC107, HFM1, AMA1 SPO22 and PCH2; the putative RNA binding domains RRM2 and RRM3 are required for Nam8p meiotic function (52…		0.996
9	YBR119W	MUD1	U1 snRNP A protein; homolog of human U1-A; involved in nuclear mRNA splicing; Belongs to the RRM U1 A/B’’ family (298 aa)		0.996
10	YDL087C	LUC7	Essential protein associated with the U1 snRNP complex; splicing factor involved in recognition of 5’ splice site; contains two zinc finger motifs; N-terminal zinc finger binds pre-mRNA; relocalizes to the cytosol in response to hypoxia; Belongs to the Luc7 family (261 aa)		0.995
